# Supplementary material
Source: HighWire-hosted journal article supplement (https://www.cfp.ca/highwire/filestream/34402/field_highwire_adjunct_files/1/321_Conflicts_of_Interest.pdf)
Supplement: 321_Conflicts_of_Interest.pdf [file 321_Conflicts_of_Interest.pdf]

## Appendix 1. Guideline and Systematic Review Author Disclosed Conflicts of Interest

[illegible]

|                             |                                                                                                                                                 |                               |                                                |   |   |   |                                                                                                                     |   |   |                                            |                                                                        |
|-----------------------------|-------------------------------------------------------------------------------------------------------------------------------------------------|-------------------------------|------------------------------------------------|---|---|---|---------------------------------------------------------------------------------------------------------------------|---|---|--------------------------------------------|------------------------------------------------------------------------|
|                             | Alberta Dept of Family Medicine                                                                                                                 |                               |                                                |   |   |   |                                                                                                                     |   |   |                                            |                                                                        |
| Tony Nickonchuk             | Clinical pharmacist, Peace River Community Health Centre, Peace River, Alberta                                                                  | X                             | X                                              | X | X | X | X                                                                                                                   | X | X | X                                          | X                                                                      |
| Eli Orrantia                | Family Physician, Marathon, Ontario                                                                                                             | X                             | X                                              | X | X | X | X                                                                                                                   | X | X | X                                          | X                                                                      |
| Kim Reich                   | Registered Social Worker, Northeast Community Health Centre, Edmonton, Alberta                                                                  | X                             | X                                              | X | X | X | X                                                                                                                   | X | X | X                                          | X                                                                      |
| Nick Wong                   | Family Physician, Lifemark Chronic Pain Program, Edmonton, Alberta                                                                              | Written on methadone for CPSA | Presented OUD workshops for CPSA, ACP and RCMP | X | X | X | X                                                                                                                   | X | X | X                                          | X                                                                      |
| <b>Evidence Review Team</b> |                                                                                                                                                 |                               |                                                |   |   |   |                                                                                                                     |   |   |                                            |                                                                        |
| G. Michael Allan            | Director of Programs and Practice Support, The College of Family Physicians of Canada, Professor, Dept of Family Medicine University of Alberta | X                             | X                                              | X | X | X | X                                                                                                                   | X | X | X                                          | BEDMED and INRange, but both publicly funded and not involving opioids |
| Nicolas Dugré               | Pharmacist, CIUSSS du Nord-de-l'Île-de-Montréal, Clinical associated professor, Faculty of Pharmacy, Université de Montréal, Montréal, Quebec   | X                             | X                                              | X | X | X | Received payments for conferences and scientific articles from Familiprix, Uniprix, Proxim, AccesPharma, EnsembleIQ | X | X | X                                          | X                                                                      |
| Caitlin Finley              | BHSc, MSc, MD Student, Class of 2021, University of Alberta                                                                                     | X                             | X                                              | X | X | X | X                                                                                                                   | X | X | X                                          | X                                                                      |
| Scott Garrison              | Associate Professor, Dept of Family Medicine, University of Alberta                                                                             | X                             | X                                              | X | X | X | X                                                                                                                   | X | X | X                                          | BEDMED and INRange, but both publicly funded and not involving opioids |
| Michael R Kolber            | Professor, Dept of Family Medicine University of Alberta                                                                                        | X                             | X                                              | X | X | X | X                                                                                                                   | X | X | Electronic Medical Procedure Reporting Inc | BEDMED and INRange, but both publicly                                  |

|                     |                                                                                                                                                                                     |   |   |   |   |   |   |   |   |                                                                                                           |                                  |
|---------------------|-------------------------------------------------------------------------------------------------------------------------------------------------------------------------------------|---|---|---|---|---|---|---|---|-----------------------------------------------------------------------------------------------------------|----------------------------------|
|                     |                                                                                                                                                                                     |   |   |   |   |   |   |   |   | (co-founder, for profit company helping proceduralists collect data on the quality of medical procedures) | funded and not involving opioids |
| Adrienne J Lindblad | Pharmacist, Knowledge Translation and Evidence Coordinator, Alberta College of Family Physicians Associate Clinical Professor, Department of Family Medicine, University of Alberta | X | X | X | X | X | X | X | X | X                                                                                                         | X                                |
| Danielle Perry      | Clinical Evidence Expert, Alberta College of Family Physicians                                                                                                                      | X | X | X | X | X | X | X | X | X                                                                                                         | X                                |
| Betsy Thomas        | Pharmacist, Project Manager, Education and KT, Alberta College of Family Physicians, Assistant Adjunct Professor, Department of Family Medicine, University of Alberta              | X | X | X | X | X | X | X | X | X                                                                                                         | X                                |
| Rhonda Ting         | Pharmacist, Edmonton, Alberta                                                                                                                                                       | X | X | X | X | X | X | X | X | X                                                                                                         | X                                |
| Joey Ton            | Pharmacist, Clinical Evidence Expert, The College of Family Physicians of Canada                                                                                                    | X | X | X | X | X | X | X | X | X                                                                                                         | X                                |
| Ben Vandermeer      | MSc, Alberta Research Centre for Health Evidence, Department of Pediatrics, University of Alberta                                                                                   | X | X | X | X | X | X | X | X | X                                                                                                         | X                                |
| Peter Yang          | BSc Pharm, MD Student, Class of 2020, University of Alberta                                                                                                                         | X | X | X | X | X | X | X | X | X                                                                                                         | X                                |

\* on topics related to the guidelines (opioid use disorder). \*\* from a commercial organization.
